# Supplementary figures and images for: Defining the Pseudomonas Genus: Where Do We Draw the Line with Azotobacter?
Source: PubMed Central journal article supplement — Microb Ecol. 2011 Aug 3;63(2):239–48. doi: 10.1007/s00248-011-9914-8 (PMC3275731; doi:10.1007/s00248-011-9914-8), 2011-08-03

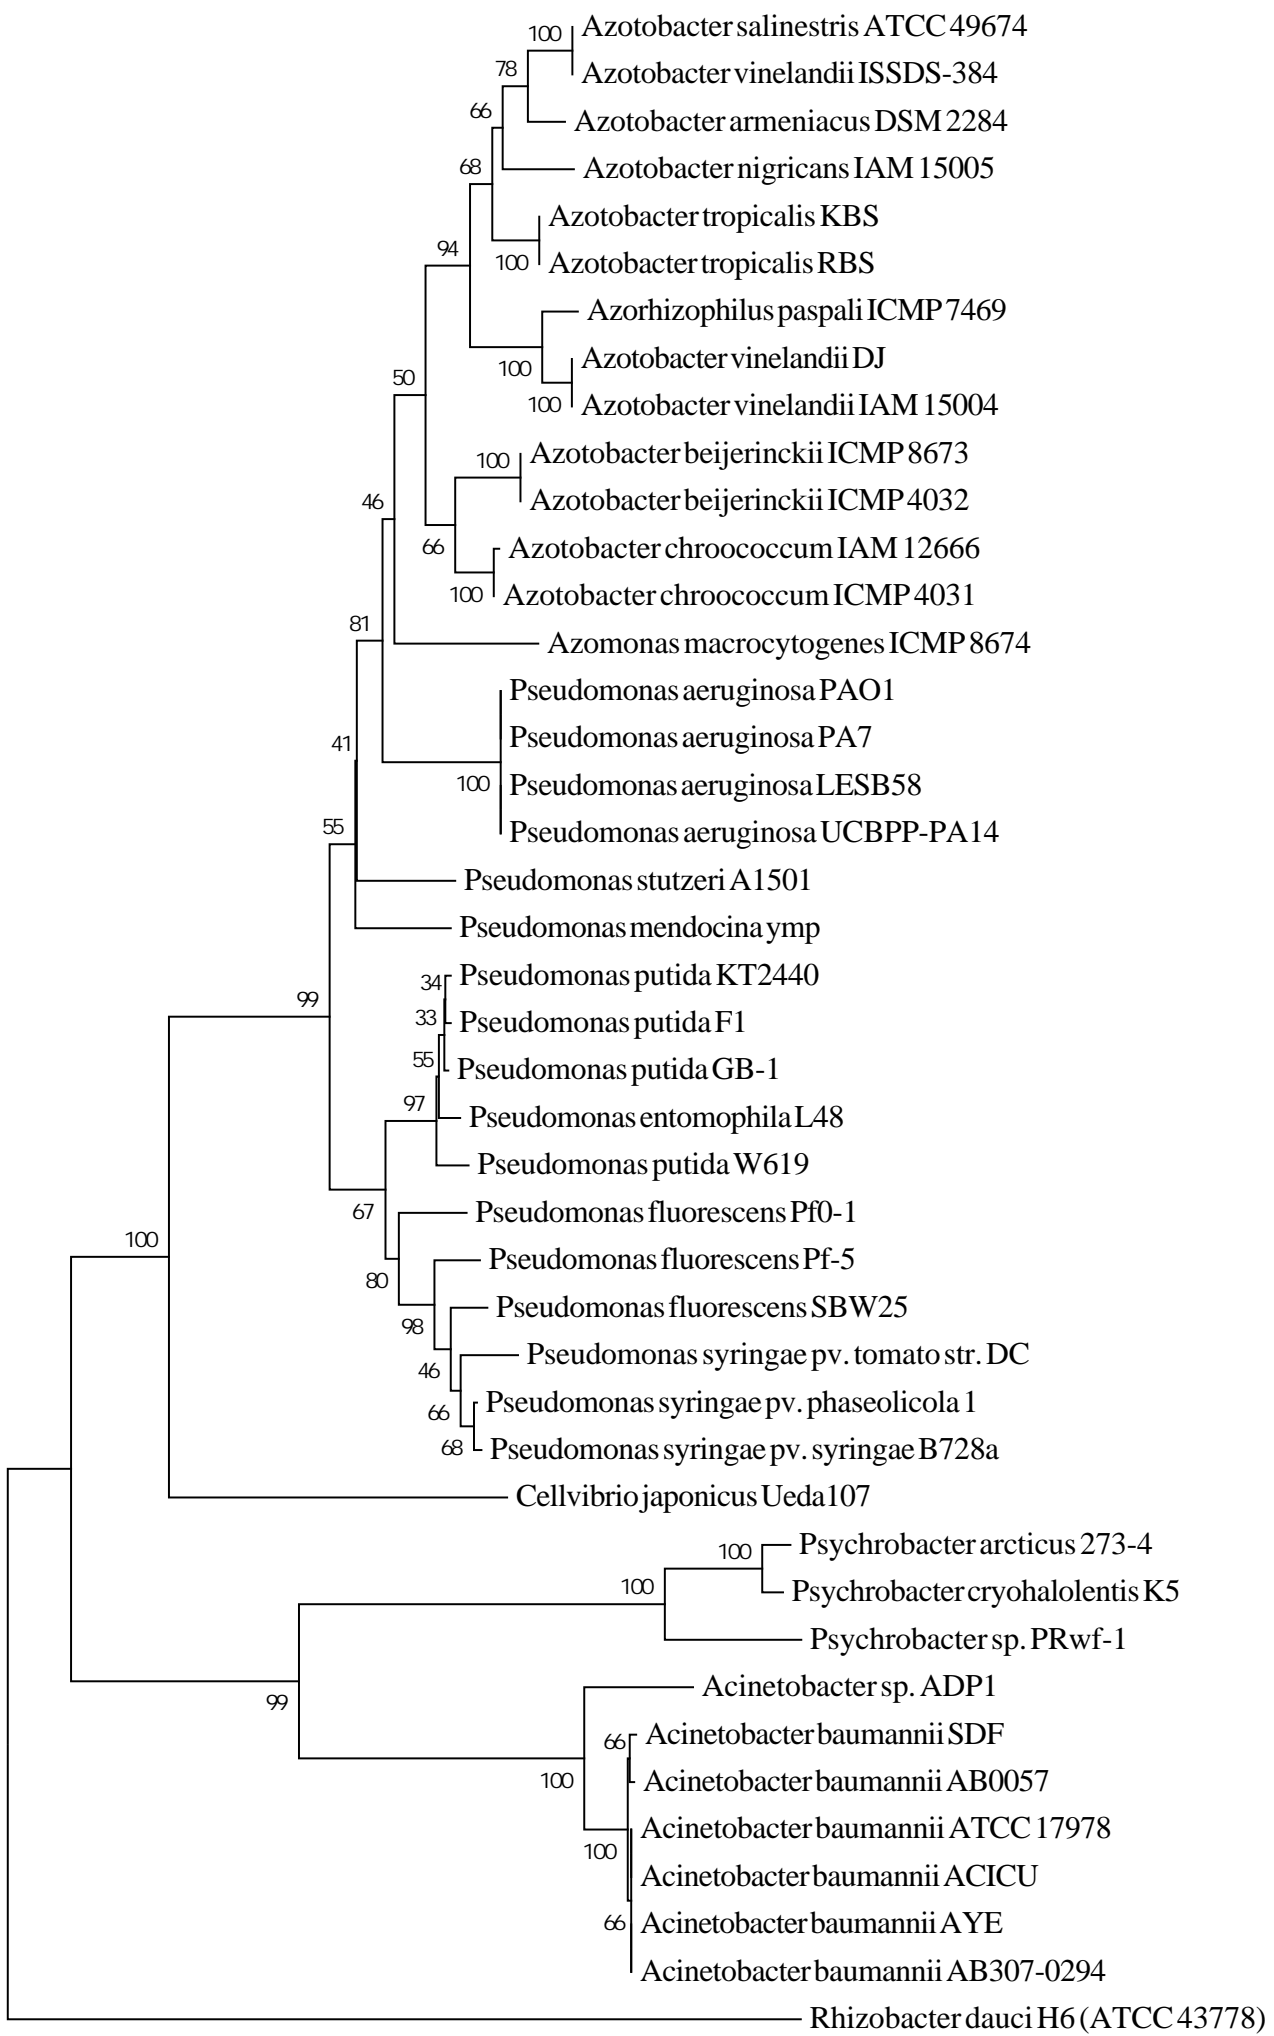

0.02

Supplement: 248_2011_9914_MOESM1_ESM.pdf [file 248_2011_9914_MOESM1_ESM.pdf]
